# Supplementary material
Source: Springer Nature journal article supplement (https://www.springermedizin.de/resource/supplementary/13601_2012_292_MOESM3_ESM.pdf/9677824)

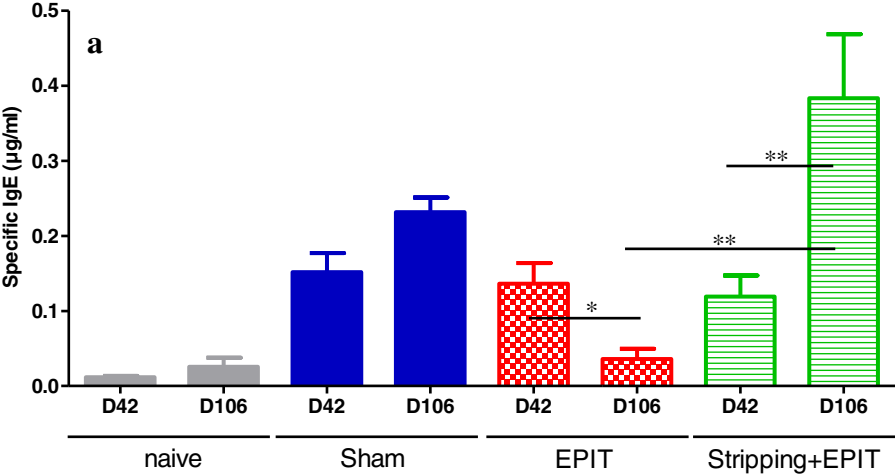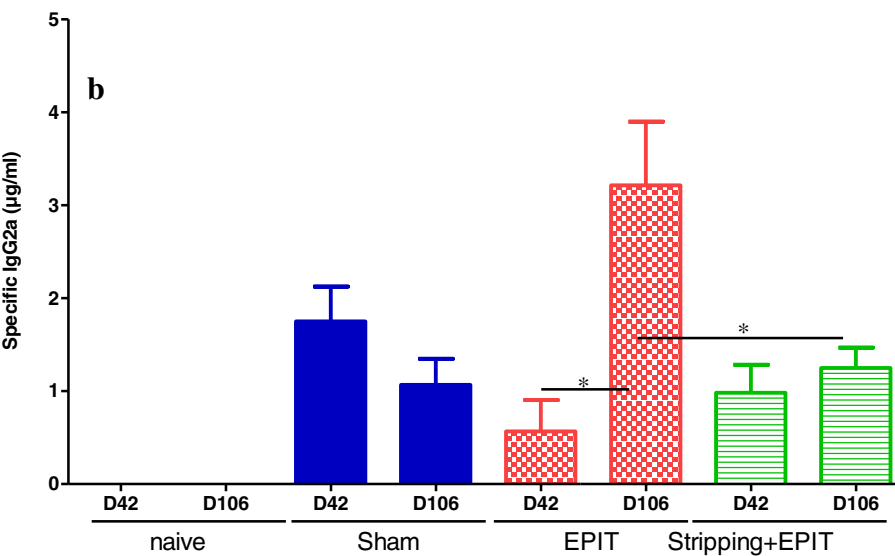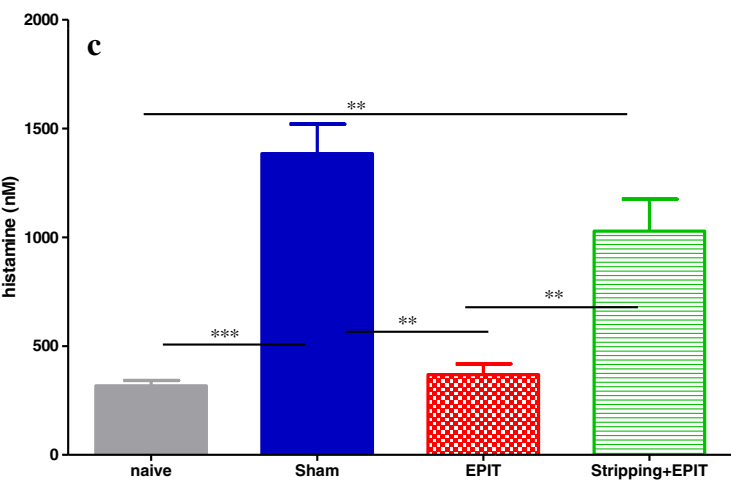

Supplement: MOESM3 [file 9677824]
